# Supplementary material
Source: PubMed Central journal article supplement (PMC4324441)
Supplement: pr500628k_si_001.pdf [file pr500628k_si_001.pdf]

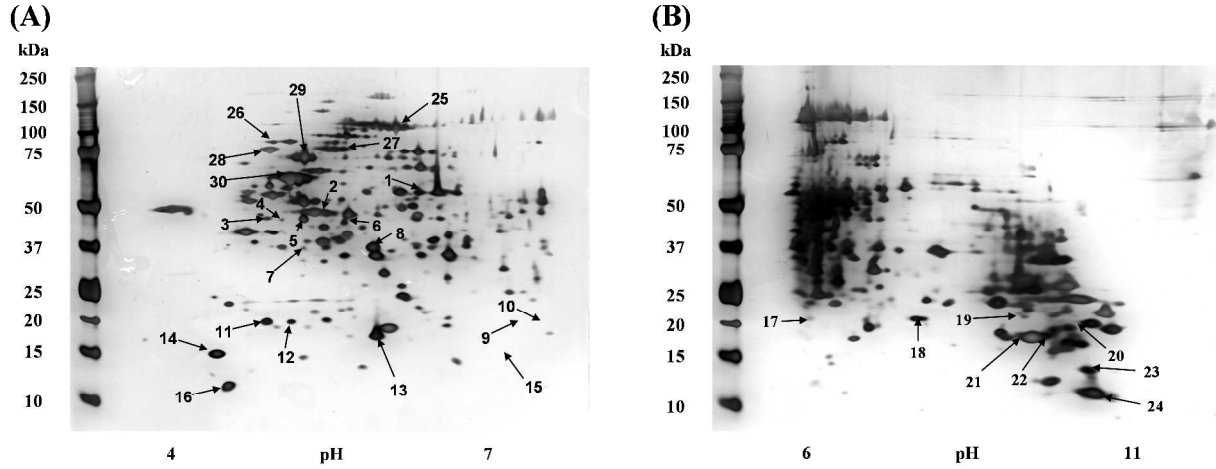

**Figure S1.** 2D-PAGE analysis of MPF. MPF (100  $\mu$ g) was separated in the first dimension (IEF) using pH range (A) 4-7 or (B) 6-11 gradients. Following second dimension separation, polyacrylamide gels were silver stained. Data are representative of a minimum of two independent experiments. The numbered arrows indicate spots taken for LC-MS/MS analysis (Table 1 and Table S2 in the Supporting Information).

**Table S1. Proteins identified in MPF by 2D LC-MS/MS**

| Protein Name                                   | Locus    | NCBI Reference Sequence | Signal Peptide | PSORTb Localization (Score) <sup>A</sup> | $\beta$ -barrel Motif | Previously Identified as Membrane (M), Secreted (T), or Surface (S) Protein and Reference | Predicted Molecular Mass (Da) | Protein Identification Probability | Number of Unique Peptides | Percentage Sequence Coverage |
|------------------------------------------------|----------|-------------------------|----------------|------------------------------------------|-----------------------|-------------------------------------------------------------------------------------------|-------------------------------|------------------------------------|---------------------------|------------------------------|
| Chromosomal replication initiator protein dnaA | FTL_0001 | YP_512811.1             | -              | Cyto (9.97)                              | -                     | -                                                                                         | 55839.60                      | 99.80%                             | 2                         | 6%                           |
| DNA polymerase III, beta chain                 | FTL_0002 | YP_512812.1             | -              | Cyto (9.26)                              | -                     | -                                                                                         | 41674.84                      | 100.00%                            | 3                         | 9%                           |
| *Outer membrane protein                        | FTL_0009 | YP_512819.1             | NC (SP)        | Peri (9.84)                              | -                     | M <sup>1,4</sup> , T <sup>5</sup>                                                         | 19477.11                      | 100.00%                            | 3                         | 24%                          |
| Recombinase A protein                          | FTL_0012 | YP_512822.1             | -              | Cyto (9.97)                              | -                     | -                                                                                         | 38833.58                      | 100.00%                            | 2                         | 8%                           |
| Phosphate acetyltransferase                    | FTL_0016 | YP_512826.1             | -              | Cyto (9.97)                              | -                     | -                                                                                         | 77167.56                      | 99.80%                             | 2                         | 4%                           |
| Aspartyl-tRNA synthetase                       | FTL_0020 | YP_512829.1             | -              | Cyto (10.00)                             | -                     | -                                                                                         | 66805.23                      | 100.00%                            | 6                         | 13%                          |
| Carbamoyl phosphate synthase large subunit     | FTL_0029 | YP_512837.1             | -              | Unknown                                  | -                     | -                                                                                         | 120723.72                     | 99.80%                             | 2                         | 2%                           |
| Hypothetical protein                           | FTL_0039 | YP_512847.1             | SpII           | Unknown                                  | -                     | -                                                                                         | 15326.41                      | 99.80%                             | 2                         | 19%                          |
| GTP-binding protein LepA                       | FTL_0071 | YP_512875.1             | -              | CM (7.88)                                | -                     | -                                                                                         | 65573.59                      | 100.00%                            | 5                         | 13%                          |
| Hypothetical protein                           | FTL_0073 | YP_512877.1             | SpII           | Unknown                                  | -                     | M <sup>1,3,6</sup>                                                                        | 37517.73                      | 100.00%                            | 5                         | 16%                          |
| Acetyltransferase protein                      | FTL_0087 | YP_512888.1             | -              | CM (9.82)                                | -                     | -                                                                                         | 27857.30                      | 99.80%                             | 2                         | 9%                           |
| Acetyltransferase protein                      | FTL_0088 | YP_512889.1             | -              | CM (10.00)                               | -                     | -                                                                                         | 28838.19                      | 100.00%                            | 2                         | 12%                          |
| ClpB protein                                   | FTL_0094 | YP_512895.1             | -              | Cyto (9.97)                              | -                     | M <sup>3</sup>                                                                            | 96047.04                      | 100.00%                            | 10                        | 15%                          |
| Hypothetical protein                           | FTL_0097 | YP_512896.1             | -              | Cyto (8.96)                              | -                     | -                                                                                         | 13793.84                      | 99.80%                             | 2                         | 19%                          |
| Hypothetical protein                           | FTL_0104 | YP_512903.1             | SpI            | Unknown                                  | -                     | -                                                                                         | 14595.73                      | 99.80%                             | 2                         | 26%                          |
| Hypothetical protein                           | FTL_0105 | YP_512904.1             | SpI            | Unknown                                  | -                     | M <sup>7</sup>                                                                            | 13728.82                      | 100.00%                            | 3                         | 35%                          |
| *Intracellular growth locus, subunit A         | FTL_0111 | YP_512909.1             | NC (SP)        | Cyto (9.97)                              | -                     | M <sup>1,3</sup> , S <sup>8</sup>                                                         | 20890.88                      | 99.80%                             | 2                         | 14%                          |
| *Intracellular growth locus, subunit B         | FTL_0112 | YP_512910.1             | -              | Cyto (9.97)                              | -                     | M <sup>6</sup>                                                                            | 57917.61                      | 100.00%                            | 11                        | 27%                          |
| *Intracellular growth locus, subunit C         | FTL_0113 | YP_512911.1             | -              | Unknown                                  | -                     | M <sup>1,3</sup> , T <sup>9</sup>                                                         | 22133.41                      | 100.00%                            | 6                         | 37%                          |
| Intracellular growth locus, subunit D          | FTL_0114 | YP_512912.1             | -              | Cyto (8.96)                              | -                     | -                                                                                         | 46401.43                      | 100.00%                            | 4                         | 11%                          |
| Hypothetical protein                           | FTL_0116 | YP_512914.1             | -              | Cyto (8.96)                              | Yes                   | M <sup>1</sup>                                                                            | 155908.31                     | 100.00%                            | 6                         | 6%                           |
| Hypothetical protein                           | FTL_0118 | YP_512916.1             | -              | Cyto (8.96)                              | -                     | T <sup>9</sup>                                                                            | 44640.56                      | 100.00%                            | 5                         | 14%                          |
| Hypothetical protein                           | FTL_0120 | YP_512918.1             | -              | Unknown                                  | -                     | -                                                                                         | 55363.07                      | 99.80%                             | 2                         | 4%                           |
| Hypothetical protein                           | FTL_0125 | YP_512923.1             | -              | Unknown                                  | -                     | T <sup>9</sup>                                                                            | 127540.09                     | 100.00%                            | 10                        | 12%                          |
| Hypothetical protein                           | FTL_0126 | YP_512924.1             | -              | Cyto (9.94)                              | -                     | T <sup>9</sup>                                                                            | 95339.57                      | 100.00%                            | 4                         | 6%                           |

|                                                      |          |             |         |              |   |                                 |          |         |   |     |
|------------------------------------------------------|----------|-------------|---------|--------------|---|---------------------------------|----------|---------|---|-----|
| Ferrous iron transport protein                       | FTL_0133 | YP_512931.1 | -       | CM (10.00)   | - | -                               | 81459.74 | 100.00% | 5 | 10% |
| Lipopolysaccharide protein                           | FTL_0137 | YP_512935.1 | NC (SP) | Unknown      | - | -                               | 38744.36 | 100.00% | 6 | 22% |
| ABC transporter, ATP-binding protein                 | FTL_0146 | YP_512944.1 | -       | CM (7.88)    | - | -                               | 49453.15 | 100.00% | 4 | 13% |
| Universal stress protein                             | FTL_0166 | YP_512961.1 | -       | Cyto (9.97)  | - | M <sup>1</sup>                  | 30220.68 | 99.80%  | 2 | 14% |
| Inner-membrane protein                               | FTL_0178 | YP_512973.1 | SpI     | CM (10.00)   | - | M <sup>4</sup>                  | 61952.44 | 100.00% | 4 | 10% |
| Acyltransferase                                      | FTL_0180 | YP_512975.1 | -       | CM (10.00)   | - | -                               | 36125.96 | 99.80%  | 2 | 8%  |
| Cytochrome d terminal oxidase, polypeptide subunit I | FTL_0189 | YP_512984.1 | -       | CM (10.00)   | - | M <sup>4</sup>                  | 64275.75 | 100.00% | 4 | 14% |
| Cytochrome O ubiquinol oxidase subunit I             | FTL_0192 | YP_512987.1 | -       | CM (10.00)   | - | M <sup>4</sup>                  | 76200.11 | 100.00% | 3 | 6%  |
| Hypothetical protein                                 | FTL_0199 | YP_512994.1 | SpII    | EC (9.64)    | - | -                               | 15640.67 | 99.80%  | 2 | 16% |
| Pyrrolidone-carboxylate peptidase                    | FTL_0207 | YP_513002.1 | SpI     | Unknown      | - | M <sup>2</sup> , T <sup>5</sup> | 24215.13 | 100.00% | 3 | 19% |
| 30S ribosomal protein S2                             | FTL_0224 | YP_513019.1 | -       | Cyto (9.97)  | - | -                               | 26421.69 | 100.00% | 8 | 36% |
| Elongation factor Ts                                 | FTL_0225 | YP_513020.1 | -       | Cyto (10.00) | - | -                               | 30959.65 | 100.00% | 8 | 34% |
| 30S ribosomal protein S7                             | FTL_0233 | YP_513028.1 | -       | Cyto (9.97)  | - | -                               | 17807.64 | 100.00% | 3 | 23% |
| *Elongation factor G                                 | FTL_0234 | YP_513029.1 | -       | Cyto (10.00) | - | -                               | 77730.37 | 100.00% | 9 | 15% |
| 30S ribosomal protein S10                            | FTL_0235 | YP_513030.1 | -       | Cyto (9.26)  | - | -                               | 11895.96 | 100.00% | 4 | 31% |
| 50S ribosomal protein L3                             | FTL_0236 | YP_513031.1 | NC (SP) | Cyto (9.26)  | - | -                               | 22307.33 | 100.00% | 3 | 20% |
| 50S ribosomal protein L4                             | FTL_0237 | YP_513032.1 | -       | Cyto (9.97)  | - | -                               | 22553.16 | 100.00% | 5 | 17% |
| 50S ribosomal protein L23                            | FTL_0238 | YP_513033.1 | NC (SP) | Cyto (9.26)  | - | -                               | 11135.83 | 100.00% | 3 | 40% |
| 50S ribosomal protein L2                             | FTL_0239 | YP_513034.1 | NC (SP) | Cyto (9.97)  | - | -                               | 30401.42 | 100.00% | 4 | 19% |
| 30S ribosomal protein S3                             | FTL_0242 | YP_513037.1 | -       | Cyto (9.97)  | - | -                               | 24877.10 | 100.00% | 3 | 17% |
| 50S ribosomal protein L16                            | FTL_0243 | YP_513038.1 | -       | Cyto (9.97)  | - | -                               | 15710.48 | 100.00% | 5 | 38% |
| 50S ribosomal protein L14                            | FTL_0246 | YP_513041.1 | -       | Cyto (9.26)  | - | -                               | 13235.48 | 100.00% | 2 | 30% |
| 50S ribosomal protein L24                            | FTL_0247 | YP_513042.1 | -       | Cyto (9.97)  | - | -                               | 11476.34 | 100.00% | 5 | 50% |
| 50S ribosomal protein L5                             | FTL_0248 | YP_513043.1 | -       | Cyto (9.26)  | - | -                               | 19996.34 | 100.00% | 8 | 51% |
| 30S ribosomal protein S8                             | FTL_0250 | YP_513045.1 | -       | Cyto (9.26)  | - | -                               | 14410.78 | 100.00% | 5 | 45% |
| 50S ribosomal protein L6                             | FTL_0251 | YP_513046.1 | SpI     | Cyto (9.26)  | - | -                               | 19075.03 | 99.90%  | 2 | 17% |
| 50S ribosomal protein L18                            | FTL_0252 | YP_513047.1 | -       | Cyto (9.97)  | - | -                               | 13036.06 | 99.80%  | 2 | 23% |
| 50S ribosomal protein L30                            | FTL_0254 | YP_513049.1 | -       | Cyto (9.26)  | - | -                               | 6871.10  | 99.80%  | 2 | 25% |
| 50S ribosomal protein L15                            | FTL_0255 | YP_513050.1 | NC (SP) | Cyto (9.26)  | - | -                               | 15095.61 | 100.00% | 4 | 32% |
| 30S ribosomal protein S13                            | FTL_0258 | YP_513053.1 | -       | Cyto (9.97)  | - | -                               | 13377.65 | 100.00% | 3 | 20% |

|                                                                  |          |             |         |             |     |                                       |           |         |    |     |
|------------------------------------------------------------------|----------|-------------|---------|-------------|-----|---------------------------------------|-----------|---------|----|-----|
| 30S ribosomal protein S4                                         | FTL_0260 | YP_513055.1 | -       | Cyto (9.97) | -   | -                                     | 23236.78  | 100.00% | 6  | 27% |
| DNA-directed RNA polymerase subunit alpha                        | FTL_0261 | YP_513056.1 | -       | Cyto (9.97) | -   | -                                     | 35357.51  | 100.00% | 3  | 14% |
| 50S ribosomal protein L17                                        | FTL_0262 | YP_513057.1 | -       | Cyto (9.97) | -   | -                                     | 16784.34  | 100.00% | 7  | 53% |
| *Heat shock protein 90                                           | FTL_0267 | YP_513061.1 | -       | Cyto (9.97) | -   | -                                     | 72371.65  | 100.00% | 7  | 15% |
| *Glutamate dehydrogenase (Gdh)                                   | FTL_0269 | YP_513063.1 | -       | Unknown     | -   | M <sup>1</sup> , T <sup>5</sup>       | 49158.07  | 100.00% | 3  | 10% |
| Heat shock protein, hsp40                                        | FTL_0281 | YP_513074.1 | NC (SP) | Cyto (9.94) | -   | -                                     | 33669.83  | 100.00% | 3  | 13% |
| DNA mismatch repair protein MutS                                 | FTL_0294 | YP_513086.1 | -       | Cyto (9.97) | -   | -                                     | 95812.74  | 99.80%  | 2  | 3%  |
| Acetyl-coenzyme A carboxylase carboxyl transferase subunit alpha | FTL_0295 | YP_513087.1 | -       | Cyto (9.97) | -   | M <sup>3</sup>                        | 35436.02  | 100.00% | 10 | 32% |
| Pyruvate dehydrogenase, E1 component (AceE)                      | FTL_0309 | YP_513101.1 | -       | Cyto (9.97) | -   | M <sup>6,10</sup>                     | 100268.34 | 100.00% | 17 | 18% |
| Dihydrolipoamide acetyltransferase (AceF)                        | FTL_0310 | YP_513102.1 | NC (SP) | Cyto (9.97) | -   | M <sup>1-3,6</sup>                    | 56798.85  | 100.00% | 8  | 19% |
| Hypothetical protein                                             | FTL_0317 | YP_513109.1 | SpII    | Unknown     | -   | M <sup>7</sup>                        | 12214.60  | 100.00% | 4  | 55% |
| *OmpA family protein                                             | FTL_0325 | YP_513113.1 | SpII    | Unknown     | -   | M <sup>2,3,10</sup>                   | 46754.18  | 100.00% | 4  | 13% |
| Hypothetical protein                                             | FTL_0333 | YP_513121.1 | -       | Cyto (9.97) | -   | -                                     | 34654.68  | 99.80%  | 2  | 7%  |
| *Peptidoglycan-associated lipoprotein                            | FTL_0336 | YP_513124.1 | SpII    | OM (10.00)  | -   | M <sup>2,4,7,10</sup>                 | 23291.32  | 100.00% | 3  | 18% |
| Ribonuclease PH                                                  | FTL_0357 | YP_513140.1 | -       | Cyto (9.26) | -   | -                                     | 25440.65  | 99.80%  | 2  | 12% |
| Hypothetical protein                                             | FTL_0358 | YP_513141.1 | -       | Unknown     | -   | -                                     | 12702.64  | 99.80%  | 2  | 21% |
| LemA-like protein                                                | FTL_0361 | YP_513144.1 | -       | Cyto (8.96) | -   | M <sup>3,7</sup>                      | 21986.26  | 99.90%  | 2  | 16% |
| *Aspartate aminotransferase (AscP1)                              | FTL_0387 | YP_513160.1 | -       | Cyto (9.97) | -   | -                                     | 44382.87  | 99.90%  | 2  | 5%  |
| 2-polyprenylphenol 6-hydroxylase                                 | FTL_0407 | YP_513180.1 | -       | CM (7.88)   | -   | -                                     | 63814.61  | 100.00% | 6  | 11% |
| GTP-binding protein EngA                                         | FTL_0414 | YP_513187.1 | -       | CM (9.82)   | -   | -                                     | 52468.74  | 99.80%  | 2  | 5%  |
| *Lipoprotein (LpnA)                                              | FTL_0421 | YP_513194.1 | SpII    | OM (10.00)  | -   | M <sup>2-4,10</sup> , S <sup>11</sup> | 15771.85  | 100.00% | 3  | 30% |
| Hypothetical protein                                             | FTL_0423 | YP_513195.1 | SpII    | Unknown     | -   | M <sup>1</sup>                        | 19303.26  | 99.80%  | 2  | 16% |
| Chromosome partition protein B                                   | FTL_0428 | YP_513200.1 | -       | Cyto (9.97) | -   | -                                     | 34592.91  | 99.80%  | 2  | 9%  |
| Isoleucyl-tRNA synthetase                                        | FTL_0436 | YP_513208.1 | -       | Cyto (9.97) | -   | -                                     | 106971.95 | 100.00% | 3  | 5%  |
| Malate dehydrogenase                                             | FTL_0438 | YP_513210.1 | -       | Cyto (8.96) | -   | -                                     | 67344.46  | 100.00% | 3  | 9%  |
| Hypothetical protein                                             | FTL_0439 | YP_513211.1 | SpI     | Unknown     | Yes | M <sup>6,10</sup>                     | 58445.63  | 99.80%  | 2  | 5%  |
| DNA topoisomerase IV subunit A                                   | FTL_0462 | YP_513234.1 | -       | Cyto (9.12) | -   | -                                     | 83930.88  | 100.00% | 6  | 9%  |
| Soluble lytic murein transglycosylase                            | FTL_0466 | YP_513238.1 | SpI     | Peri (9.44) | Yes | -                                     | 76931.27  | 99.80%  | 2  | 3%  |
| Lysine decarboxylase, inducible                                  | FTL_0476 | YP_513248.1 | -       | Cyto (9.97) | -   | -                                     | 81935.00  | 100.00% | 3  | 6%  |

|                                                                               |          |             |         |             |     |                                                         |           |         |   |     |
|-------------------------------------------------------------------------------|----------|-------------|---------|-------------|-----|---------------------------------------------------------|-----------|---------|---|-----|
| Glycine dehydrogenase subunit 2                                               | FTL_0480 | YP_513252.1 | -       | Cyto (9.97) | -   | -                                                       | 52781.98  | 99.80%  | 2 | 3%  |
| DNA gyrase, subunit A                                                         | FTL_0533 | YP_513302.1 | -       | Cyto (9.97) | -   | -                                                       | 97102.92  | 100.00% | 5 | 6%  |
| UDP-N-acetylglucosamine acyltransferase                                       | FTL_0539 | YP_513308.1 | -       | Cyto (9.97) | -   | -                                                       | 28124.64  | 100.00% | 5 | 27% |
| Two-component response regulator                                              | FTL_0552 | YP_513318.1 | -       | Cyto (9.97) | -   | -                                                       | 25519.67  | 100.00% | 3 | 21% |
| Ribonuclease R                                                                | FTL_0556 | YP_513322.1 | -       | Cyto (9.97) | -   | -                                                       | 85994.62  | 100.00% | 7 | 14% |
| *Hypothetical protein                                                         | FTL_0569 | YP_513329.1 | SpI     | Unknown     | -   | -                                                       | 19785.57  | 100.00% | 2 | 14% |
| Hypothetical protein                                                          | FTL_0571 | YP_513331.1 | SpII    | Unknown     | -   | M <sup>2</sup>                                          | 22451.65  | 100.00% | 3 | 22% |
| *Hypothetical protein                                                         | FTL_0572 | YP_513332.1 | SpI     | Unknown     | -   | M <sup>1,3</sup>                                        | 51977.34  | 100.00% | 3 | 9%  |
| Hypothetical protein                                                          | FTL_0574 | YP_513334.1 | SpI     | OM (9.49)   | Yes | -                                                       | 52201.14  | 99.80%  | 2 | 6%  |
| Fusion product of 3-hydroxacyl-CoA dehydrogenase and acyl-CoA-binding protein | FTL_0584 | YP_513344.1 | -       | Cyto (9.97) | -   | -                                                       | 100624.28 | 100.00% | 7 | 11% |
| Acyl-CoA dehydrogenase                                                        | FTL_0585 | YP_513345.1 | -       | Unknown     | -   | -                                                       | 83333.70  | 100.00% | 7 | 14% |
| Hypothetical protein                                                          | FTL_0589 | YP_513349.1 | -       | CM (9.82)   | -   | -                                                       | 33263.61  | 99.80%  | 2 | 9%  |
| dTDP-glucose 4,6-dehydratase                                                  | FTL_0592 | YP_513352.1 | -       | CM (10.00)  | -   | -                                                       | 65709.53  | 100.00% | 4 | 9%  |
| Galactosyl transferase                                                        | FTL_0593 | YP_513353.1 | -       | CM (9.82)   | -   | -                                                       | 23778.16  | 99.80%  | 2 | 7%  |
| UDP-glucose 4-epimerase                                                       | FTL_0594 | YP_513354.1 | SpI     | Unknown     | -   | -                                                       | 29955.57  | 100.00% | 4 | 19% |
| Galacturonosyl transferase                                                    | FTL_0595 | YP_513355.1 | -       | Cyto (9.97) | -   | -                                                       | 41599.47  | 100.00% | 5 | 13% |
| UDP-glucose/GDP-mannose dehydrogenase                                         | FTL_0596 | YP_513356.1 | -       | Cyto (9.97) | -   | -                                                       | 48862.13  | 100.00% | 2 | 5%  |
| Glycosyltransferase                                                           | FTL_0604 | YP_513364.1 | -       | Cyto (8.96) | -   | M <sup>4</sup>                                          | 32975.90  | 100.00% | 3 | 12% |
| Transcription termination factor Rho                                          | FTL_0610 | YP_513370.1 | -       | CM (7.88)   | -   | -                                                       | 47129.05  | 100.00% | 4 | 12% |
| DNA-directed RNA polymerase subunit alpha                                     | FTL_0616 | YP_513375.1 | -       | Cyto (9.97) | -   | -                                                       | 35074.14  | 100.00% | 5 | 15% |
| *Hypothetical protein                                                         | FTL_0617 | YP_513376.1 | -       | Cyto (8.96) | -   | M <sup>1,3,4</sup> , T <sup>5,12</sup> , S <sup>8</sup> | 16809.36  | 100.00% | 3 | 31% |
| ABC transporter, ATP-binding protein                                          | FTL_0623 | YP_513379.1 | -       | Cyto (9.12) | -   | -                                                       | 34827.65  | 100.00% | 4 | 15% |
| Glycosyl transferase                                                          | FTL_0625 | YP_513381.1 | -       | CM (9.99)   | -   | M <sup>4</sup>                                          | 35582.32  | 99.80%  | 2 | 11% |
| Hypothetical protein                                                          | FTL_0655 | YP_513408.1 | NC (SP) | Unknown     | -   | -                                                       | 40009.17  | 100.00% | 4 | 15% |
| Hypothetical protein                                                          | FTL_0656 | YP_513409.1 | -       | Cyto (8.96) | -   | -                                                       | 44513.74  | 99.80%  | 2 | 7%  |
| Pantothenate kinase                                                           | FTL_0671 | YP_513423.1 | -       | Cyto (8.96) | -   | -                                                       | 27922.49  | 99.80%  | 2 | 5%  |
| Pantoate-beta-alanine ligase                                                  | FTL_0673 | YP_513425.1 | -       | Cyto (9.97) | -   | -                                                       | 29685.32  | 100.00% | 5 | 20% |
| Hypothetical protein                                                          | FTL_0675 | YP_513427.1 | -       | Unknown     | -   | -                                                       | 27475.54  | 99.80%  | 2 | 11% |

|                                                                               |          |             |         |             |   |                    |           |         |    |     |
|-------------------------------------------------------------------------------|----------|-------------|---------|-------------|---|--------------------|-----------|---------|----|-----|
| Polyamine transporter, ABC transporter, ATP-binding protein                   | FTL_0681 | YP_513433.1 | -       | CM (10.00)  | - | M <sup>2</sup>     | 42296.53  | 99.80%  | 2  | 8%  |
| Outer membrane efflux protein                                                 | FTL_0686 | YP_513437.1 | SpII    | OM (10.00)  | - | M <sup>2,10</sup>  | 54535.43  | 100.00% | 5  | 19% |
| HlyD family secretion protein                                                 | FTL_0687 | YP_513438.1 | NC (SP) | Unknown     | - | M <sup>2</sup>     | 37853.27  | 99.80%  | 2  | 7%  |
| Cell entry (mce) related family protein                                       | FTL_0695 | YP_513446.1 | -       | CM (9.82)   | - | M <sup>2</sup>     | 26945.01  | 100.00% | 4  | 19% |
| Ribonuclease E                                                                | FTL_0717 | YP_513468.1 | -       | Cyto (9.94) | - | -                  | 95948.52  | 100.00% | 14 | 25% |
| Type IV pilin multimeric outer membrane protein                               | FTL_0800 | YP_513532.1 | SpI     | OM (10.00)  | - | M <sup>10</sup>    | 64493.72  | 100.00% | 3  | 6%  |
| Shikimate kinase I                                                            | FTL_0801 | YP_513533.1 | -       | Cyto (9.97) | - | -                  | 19752.84  | 100.00% | 3  | 14% |
| Bifunctional proline dehydrogenase, pyrroline-5-carboxylate dehydrogenase     | FTL_0805 | YP_513537.1 | -       | Cyto (9.97) | - | -                  | 150007.35 | 100.00% | 19 | 18% |
| Type IV pili nucleotide binding protein, ABC transporter, ATP-binding protein | FTL_0828 | YP_513550.1 | -       | Cyto (9.97) | - | -                  | 67091.35  | 100.00% | 5  | 12% |
| Glycerophosphoryl diester phosphodiesterase                                   | FTL_0829 | YP_513551.1 | -       | Cyto (9.97) | - | -                  | 29669.29  | 99.80%  | 2  | 12% |
| Cyanophycin synthetase                                                        | FTL_0831 | YP_513553.1 | -       | Cyto (9.97) | - | -                  | 103993.16 | 100.00% | 3  | 5%  |
| Rhodanese-like family protein                                                 | FTL_0834 | YP_513556.1 | NC (SP) | Unknown     | - | -                  | 27864.42  | 99.80%  | 2  | 11% |
| D-methionine transport protein, ABC transporter, ATP-binding subunit          | FTL_0838 | YP_513560.1 | -       | CM (7.88)   | - | M <sup>4</sup>     | 39193.40  | 100.00% | 8  | 34% |
| Preprotein translocase family protein                                         | FTL_0847 | YP_513569.1 | SpI     | CM (10.00)  | - | M <sup>4</sup>     | 12881.27  | 100.00% | 3  | 33% |
| Preprotein translocase subunit SecD                                           | FTL_0848 | YP_513570.1 | -       | CM (10.00)  | - | M <sup>4</sup>     | 69654.94  | 100.00% | 9  | 23% |
| Major facilitator transporter                                                 | FTL_0865 | YP_513587.1 | -       | CM (10.00)  | - | M <sup>4</sup>     | 49728.62  | 100.00% | 3  | 7%  |
| Peptidase, M24 family protein                                                 | FTL_0877 | YP_513597.1 | -       | Cyto (8.96) | - | -                  | 68759.17  | 100.00% | 2  | 6%  |
| Trigger factor                                                                | FTL_0891 | YP_513610.1 | -       | Cyto (8.96) | - | -                  | 49570.86  | 100.00% | 5  | 13% |
| ATP-dependent Clp protease subunit P                                          | FTL_0892 | YP_513611.1 | -       | Cyto (9.97) | - | -                  | 22150.49  | 99.80%  | 2  | 13% |
| DNA-binding, ATP-dependent protease La                                        | FTL_0894 | YP_513613.1 | -       | Cyto (9.97) | - | -                  | 86222.64  | 100.00% | 9  | 14% |
| Hypothetical protein                                                          | FTL_0896 | YP_513615.1 | NC (SP) | CM (9.82)   | - | -                  | 54765.05  | 100.00% | 3  | 9%  |
| Protease, GTP-binding subunit                                                 | FTL_0899 | YP_513618.1 | -       | Cyto (8.96) | - | -                  | 50111.49  | 99.80%  | 2  | 7%  |
| SPFH domain, band 7 family protein                                            | FTL_0903 | YP_513622.1 | -       | Cyto (8.96) | - | M <sup>4</sup>     | 40421.33  | 100.00% | 4  | 12% |
| SPFH domain, band 7 family protein                                            | FTL_0904 | YP_513623.1 | -       | Unknown     | - | M <sup>1,2,4</sup> | 34589.21  | 100.00% | 8  | 28% |
| Ketol-acid reductoisomerase                                                   | FTL_0916 | YP_513629.1 | NC (SP) | Cyto (9.26) | - | -                  | 37878.69  | 99.80%  | 2  | 6%  |
| Glutaredoxin 2                                                                | FTL_0923 | YP_513636.1 | -       | Cyto (8.96) | - | -                  | 25150.96  | 99.80%  | 2  | 14% |
| Ferritin-like protein                                                         | FTL_0926 | YP_513639.1 | -       | Cyto (9.26) | - | M <sup>4</sup>     | 19073.63  | 100.00% | 3  | 33% |

|                                                                                 |          |             |         |             |   |                                    |          |         |   |     |
|---------------------------------------------------------------------------------|----------|-------------|---------|-------------|---|------------------------------------|----------|---------|---|-----|
| Aldolase/adducin class II family protein                                        | FTL_0939 | YP_513652.1 | -       | Cyto (9.97) | - | -                                  | 26480.33 | 99.80%  | 2 | 13% |
| Ribose-phosphate pyrophosphokinase                                              | FTL_0949 | YP_513660.1 | -       | Cyto (9.97) | - | -                                  | 34909.35 | 99.80%  | 2 | 8%  |
| 50S ribosomal protein L25                                                       | FTL_0950 | YP_513661.1 | -       | Cyto (9.26) | - | -                                  | 10903.65 | 99.80%  | 2 | 34% |
| Hypothetical protein                                                            | FTL_0951 | YP_513662.1 | -       | CM (10.00)  | - | -                                  | 46805.03 | 100.00% | 3 | 11% |
| ATP-dependent protease, ATP-binding subunit                                     | FTL_0964 | YP_513675.1 | -       | Cyto (9.97) | - | -                                  | 51237.15 | 99.90%  | 2 | 5%  |
| Lactate dehydrogenase                                                           | FTL_0987 | YP_513695.1 | -       | Cyto (9.97) | - | T <sup>5</sup>                     | 34076.74 | 100.00% | 4 | 13% |
| Haloacid dehalogenase                                                           | FTL_0995 | YP_513701.1 | -       | Cyto (8.96) | - | -                                  | 21938.39 | 99.80%  | 2 | 15% |
| Hypothetical protein                                                            | FTL_1013 | YP_513714.1 | -       | CM (10.00)  | - | -                                  | 27667.18 | 100.00% | 3 | 12% |
| *AhpC/TSA family protein                                                        | FTL_1015 | YP_513716.1 | NC (SP) | Unknown     | - | M <sup>3</sup> , T <sup>5,12</sup> | 19668.22 | 100.00% | 3 | 25% |
| 30S ribosomal protein S6                                                        | FTL_1024 | YP_513725.1 | -       | Cyto (9.97) | - | -                                  | 13054.09 | 99.90%  | 2 | 28% |
| *50S ribosomal protein L9 (RplI)                                                | FTL_1026 | YP_513727.1 | -       | Cyto (9.97) | - | T <sup>5</sup>                     | 16087.49 | 100.00% | 7 | 56% |
| Ribosomal large subunit pseudouridine synthase B                                | FTL_1030 | YP_513731.1 | -       | Cyto (9.97) | - | -                                  | 31171.86 | 100.00% | 3 | 11% |
| FKBP-type peptidyl-prolyl cis-trans isomerase family protein                    | FTL_1042 | YP_513742.1 | SpII    | OM (9.92)   | - | M <sup>1-3,10</sup>                | 29357.52 | 100.00% | 6 | 27% |
| D-alanyl-D-alanine carboxypeptidase (penicillin binding protein) family protein | FTL_1046 | YP_513746.1 | SpI     | Peri (9.44) | - | -                                  | 51339.76 | 100.00% | 3 | 11% |
| 30S ribosomal protein S21                                                       | FTL_1047 | YP_513747.1 | -       | Cyto (9.26) | - | -                                  | 7840.30  | 99.80%  | 2 | 15% |
| RNA polymerase sigma-70 factor                                                  | FTL_1050 | YP_513750.1 | -       | Cyto (9.97) | - | -                                  | 67646.46 | 99.80%  | 2 | 4%  |
| D-alanyl-D-alanine carboxypeptidase (penicillin binding protein) family protein | FTL_1060 | YP_513757.1 | SpI     | Unknown     | - | M <sup>2,13</sup>                  | 48033.60 | 100.00% | 3 | 14% |
| Hypothetical protein                                                            | FTL_1064 | YP_513761.1 | SpI     | Unknown     | - | -                                  | 31675.76 | 100.00% | 3 | 16% |
| Hypothetical protein                                                            | FTL_1067 | YP_513764.1 | -       | Cyto (9.97) | - | -                                  | 69415.81 | 100.00% | 3 | 7%  |
| Bifunctional GMP synthase/glutamine amidotransferase protein                    | FTL_1071 | YP_513768.1 | -       | Cyto (9.97) | - | -                                  | 57698.31 | 99.80%  | 2 | 5%  |
| 1-deoxy-D-xylulose-5-phosphate synthase                                         | FTL_1072 | YP_513769.1 | -       | Cyto (9.97) | - | -                                  | 67385.50 | 100.00% | 3 | 10% |
| *Lipoprotein (DsbG)                                                             | FTL_1096 | YP_513788.1 | SpII    | Unknown     | - | M <sup>1,2,4,7,10,13</sup>         | 39545.19 | 100.00% | 6 | 27% |
| Macrophage infectivity potentiator, fragment                                    | FTL_1097 | YP_513789.1 | SpI     | Unknown     | - | -                                  | 10524.01 | 99.80%  | 2 | 37% |
| Hypothetical protein                                                            | FTL_1100 | YP_513790.1 | -       | Cyto (9.97) | - | -                                  | 15476.99 | 99.80%  | 2 | 19% |
| 3-oxoacyl-[acyl-carrier-protein] synthase II                                    | FTL_1137 | YP_513823.1 | NC (SP) | Cyto (9.26) | - | -                                  | 44020.95 | 100.00% | 3 | 10% |
| 3-oxoacyl-(acyl-carrier-protein) reductase                                      | FTL_1139 | YP_513825.1 | -       | Cyto (9.26) | - | -                                  | 26357.24 | 100.00% | 3 | 20% |

|                                                                                               |          |             |         |              |     |                                                                 |          |         |   |     |
|-----------------------------------------------------------------------------------------------|----------|-------------|---------|--------------|-----|-----------------------------------------------------------------|----------|---------|---|-----|
| Putative glycerol-3-phosphate acyltransferase PlsX                                            | FTL_1142 | YP_513828.1 | -       | Cyto (9.97)  | -   | -                                                               | 37840.30 | 100.00% | 4 | 22% |
| Pyruvate kinase                                                                               | FTL_1148 | YP_513834.1 | -       | Cyto (9.97)  | -   | -                                                               | 51776.46 | 100.00% | 5 | 13% |
| Fructose-1,6-bisphosphate aldolase                                                            | FTL_1149 | YP_513835.1 | -       | Cyto (9.97)  | -   | -                                                               | 38159.39 | 99.80%  | 2 | 7%  |
| 30S ribosomal protein S9                                                                      | FTL_1186 | YP_513869.1 | NC (SP) | Cyto (9.97)  | -   | -                                                               | 14736.01 | 99.80%  | 2 | 22% |
| 50S ribosomal protein L13                                                                     | FTL_1187 | YP_513870.1 | NC (SP) | Cyto (9.26)  | -   | -                                                               | 15937.61 | 100.00% | 3 | 30% |
| *Chaperone protein DnaK                                                                       | FTL_1191 | YP_513874.1 | NC (SP) | Cyto (9.97)  | -   | M <sup>3,6,10</sup> , T <sup>5,12</sup> , S <sup>8</sup>        | 69182.22 | 100.00% | 3 | 6%  |
| Heat shock protein DnaJ                                                                       | FTL_1192 | YP_513875.1 | -       | Cyto (9.97)  | -   | -                                                               | 41480.80 | 100.00% | 5 | 14% |
| Phenylalanyl-tRNA synthetase subunit alpha                                                    | FTL_1197 | YP_513880.1 | -       | Cyto (10.00) | -   | -                                                               | 38505.40 | 99.80%  | 2 | 7%  |
| Phenylalanyl-tRNA synthetase, beta subunit                                                    | FTL_1198 | YP_513881.1 | -       | Cyto (9.97)  | -   | -                                                               | 88165.30 | 100.00% | 2 | 3%  |
| Hypothetical protein                                                                          | FTL_1202 | YP_513885.1 | SpII    | Unknown      | -   | -                                                               | 36896.57 | 100.00% | 3 | 13% |
| Lipoprotein                                                                                   | FTL_1211 | YP_513894.1 | SpII    | Unknown      | -   | M <sup>2</sup>                                                  | 21033.65 | 100.00% | 3 | 22% |
| Hypothetical protein                                                                          | FTL_1213 | YP_513896.1 | SpI     | Cyto (8.96)  | -   | -                                                               | 73307.99 | 100.00% | 4 | 10% |
| Hypothetical protein                                                                          | FTL_1219 | YP_513902.1 | -       | Cyto (9.26)  | -   | -                                                               | 47072.58 | 99.90%  | 2 | 5%  |
| Signal recognition particle protein, Ffh                                                      | FTL_1239 | YP_513919.1 | -       | CM (7.88)    | -   | M <sup>4</sup>                                                  | 50311.00 | 100.00% | 9 | 30% |
| 2-amino-4-hydroxy-6-hydroxymethylidihydropteridine pyrophosphokinase/dihydropteroate synthase | FTL_1265 | YP_513939.1 | -       | Cyto (9.97)  | -   | -                                                               | 48246.88 | 99.80%  | 2 | 4%  |
| Biotin synthase                                                                               | FTL_1272 | YP_513943.1 | -       | Cyto (9.97)  | -   | -                                                               | 34906.21 | 100.00% | 4 | 17% |
| Dethiobiotin synthetase                                                                       | FTL_1275 | YP_513946.1 | -       | Cyto (9.26)  | -   | -                                                               | 24502.30 | 99.90%  | 2 | 13% |
| Glutathione synthetase                                                                        | FTL_1284 | YP_513955.1 | -       | Cyto (9.97)  | -   | -                                                               | 37159.94 | 99.90%  | 2 | 8%  |
| 23S rRNA m(2)G2445 methyltransferase                                                          | FTL_1287 | YP_513958.1 | -       | Cyto (9.97)  | -   | -                                                               | 83481.52 | 100.00% | 3 | 6%  |
| Acetyl-CoA carboxylase beta subunit                                                           | FTL_1309 | YP_513980.1 | -       | Cyto (9.26)  | -   | -                                                               | 33386.81 | 100.00% | 6 | 14% |
| *Outer membrane associated protein FopA1                                                      | FTL_1328 | YP_513994.1 | SpI     | OM (9.93)    | Yes | M <sup>2,3,7,10</sup> , T <sup>5</sup> , S <sup>8</sup> ,<br>14 | 41259.65 | 100.00% | 7 | 19% |
| Hypothetical protein                                                                          | FTL_1341 | YP_514006.1 | -       | Unknown      | -   | -                                                               | 15407.51 | 99.80%  | 2 | 16% |
| UTP--glucose-1-phosphate uridylyltransferase                                                  | FTL_1357 | YP_514018.1 | -       | Cyto (9.97)  | -   | M <sup>1</sup>                                                  | 32148.15 | 100.00% | 3 | 7%  |
| Cation-efflux family protein                                                                  | FTL_1358 | YP_514019.1 | -       | CM (10.00)   | -   | M <sup>4</sup>                                                  | 42813.45 | 100.00% | 4 | 15% |
| Hypothetical protein                                                                          | FTL_1363 | YP_514024.1 | NC (SP) | Unknown      | -   | -                                                               | 36704.83 | 100.00% | 3 | 9%  |
| Hypothetical protein                                                                          | FTL_1364 | YP_514025.1 | -       | Cyto (8.96)  | -   | -                                                               | 26430.83 | 100.00% | 4 | 24% |
| Hypothetical protein                                                                          | FTL_1384 | YP_514040.1 | SpI     | Unknown      | -   | -                                                               | 13313.44 | 99.80%  | 2 | 18% |



|                                                            |          |             |         |              |     |                                           |           |         |    |     |
|------------------------------------------------------------|----------|-------------|---------|--------------|-----|-------------------------------------------|-----------|---------|----|-----|
| Cold-shock DEAD-box protein A                              | FTL_1392 | YP_514047.1 | -       | Cyto (9.97)  | -   | -                                         | 64008.24  | 100.00% | 14 | 31% |
| 50S ribosomal protein L20                                  | FTL_1404 | YP_514059.1 | NC (SP) | Cyto (9.26)  | -   | -                                         | 13348.57  | 100.00% | 3  | 27% |
| Threonyl-tRNA synthetase                                   | FTL_1407 | YP_514062.1 | -       | Cyto (10.00) | -   | -                                         | 72381.56  | 100.00% | 2  | 3%  |
| Hypothetical protein                                       | FTL_1414 | YP_514069.1 | NC (SP) | Unknown      | -   | M <sup>4</sup>                            | 44264.38  | 100.00% | 3  | 7%  |
| Capsule biosynthesis protein capB                          | FTL_1416 | YP_514071.1 | -       | CM (7.88)    | -   | M <sup>4</sup>                            | 44579.71  | 100.00% | 4  | 12% |
| Cyanophycinase                                             | FTL_1419 | YP_514074.1 | -       | Unknown      | -   | -                                         | 29302.93  | 99.80%  | 2  | 9%  |
| Carbohydrate/purine kinase pfkB family protein             | FTL_1420 | YP_514075.1 | -       | Cyto (9.26)  | -   | -                                         | 40313.98  | 99.80%  | 2  | 5%  |
| Hypothetical protein                                       | FTL_1426 | YP_514081.1 | -       | Cyto (8.96)  | -   | -                                         | 26495.63  | 100.00% | 3  | 16% |
| Enoyl-[acyl-carrier-protein] reductase (NADH)              | FTL_1442 | YP_514097.1 | -       | CM (9.82)    | -   | -                                         | 27775.17  | 99.80%  | 2  | 8%  |
| 50S ribosomal protein L21                                  | FTL_1453 | YP_514108.1 | NC (SP) | Cyto (9.26)  | -   | -                                         | 11561.63  | 100.00% | 4  | 34% |
| Preprotein translocase subunit SecA                        | FTL_1458 | YP_514109.1 | -       | Cyto (9.12)  | -   | M <sup>4</sup>                            | 103590.04 | 100.00% | 5  | 8%  |
| ATP-dependent metalloprotease                              | FTL_1464 | YP_514115.1 | -       | CM (10.00)   | -   | M <sup>4</sup>                            | 70752.29  | 100.00% | 4  | 8%  |
| Inosine-5-monophosphate dehydrogenase                      | FTL_1478 | YP_514129.1 | -       | Cyto (9.97)  | -   | M <sup>2,3</sup>                          | 52091.72  | 100.00% | 3  | 8%  |
| Cytosol aminopeptidase                                     | FTL_1479 | YP_514130.1 | -       | Cyto (9.97)  | -   | -                                         | 51988.90  | 100.00% | 2  | 6%  |
| FAD-binding family protein                                 | FTL_1489 | YP_514140.1 | -       | Cyto (9.94)  | Yes | -                                         | 114567.82 | 100.00% | 6  | 8%  |
| Deoxyguanosinetriphosphate triphosphohydrolase             | FTL_1503 | YP_514153.1 | -       | Cyto (9.97)  | -   | -                                         | 50409.72  | 99.80%  | 2  | 6%  |
| *Peroxidase/catalase (KatG)                                | FTL_1504 | YP_514154.1 | NC (SP) | Cyto (9.26)  | -   | M <sup>2,3,6,10</sup> , T <sup>5,12</sup> | 81226.95  | 100.00% | 5  | 10% |
| Glycerophosphoryl diester phosphodiesterase family protein | FTL_1511 | YP_514160.1 | SpI     | Unknown      | -   | M <sup>1-3</sup> , T <sup>5</sup>         | 39076.81  | 100.00% | 4  | 17% |
| 2-amino-3-ketobutyrate coenzyme A ligase                   | FTL_1522 | YP_514169.1 | -       | Cyto (9.97)  | -   | -                                         | 43952.33  | 99.80%  | 2  | 9%  |
| *Enolase (2-phosphoglycerate dehydratase)                  | FTL_1527 | YP_514174.1 | -       | Cyto (9.97)  | -   | -                                         | 49511.19  | 100.00% | 6  | 22% |
| Polynucleotide phosphorylase/polyadenylase                 | FTL_1537 | YP_514183.1 | -       | Cyto (9.97)  | -   | -                                         | 75501.74  | 100.00% | 8  | 15% |
| Penicillin binding protein (peptidoglycan synthetase)      | FTL_1539 | YP_514185.1 | -       | CM (9.82)    | -   | T <sup>5</sup>                            | 62733.93  | 100.00% | 4  | 8%  |
| Hypothetical protein                                       | FTL_1542 | YP_514188.1 | -       | CM (7.88)    | -   | -                                         | 78582.16  | 100.00% | 6  | 11% |
| Glutamine amidotransferase subunit PdxT                    | FTL_1545 | YP_514191.1 | -       | Unknown      | -   | -                                         | 19960.97  | 99.90%  | 2  | 13% |
| DNA gyrase subunit B                                       | FTL_1547 | YP_514193.1 | -       | Cyto (9.97)  | -   | -                                         | 89740.80  | 100.00% | 2  | 3%  |
| Hypothetical protein                                       | FTL_1552 | YP_514198.1 | -       | CM (10.00)   | -   | -                                         | 69884.07  | 100.00% | 12 | 26% |
| *Succinyl-CoA synthetase subunit beta                      | FTL_1553 | YP_514199.1 | -       | Cyto (8.96)  | -   | M <sup>6</sup> , T <sup>12</sup>          | 41541.74  | 100.00% | 4  | 12% |

|                                                                              |          |             |         |              |   |                                                           |           |         |    |     |
|------------------------------------------------------------------------------|----------|-------------|---------|--------------|---|-----------------------------------------------------------|-----------|---------|----|-----|
| Acetyl-CoA carboxylase, biotin carboxylase subunit                           | FTL_1591 | YP_514230.1 | -       | Cyto (9.97)  | - | -                                                         | 50050.70  | 100.00% | 6  | 17% |
| *Acetyl-CoA carboxylase, biotin carboxyl carrier protein subunit (AccB)      | FTL_1592 | YP_514231.1 | -       | Unknown      | - | M <sup>2,3</sup>                                          | 16403.98  | 100.00% | 4  | 48% |
| Putative periplasmic protease                                                | FTL_1605 | YP_514244.1 | -       | CM (7.88)    | - | T <sup>5</sup>                                            | 38067.40  | 100.00% | 7  | 18% |
| Dolichyl-phosphate-mannose-protein mannosyltransferase family protein        | FTL_1609 | YP_514248.1 | -       | CM (10.00)   | - | -                                                         | 68148.00  | 99.80%  | 2  | 4%  |
| Glycosyl transferase, group 2 family protein                                 | FTL_1611 | YP_514250.1 | -       | CM (9.82)    | - | M <sup>4</sup>                                            | 35935.44  | 100.00% | 4  | 15% |
| Phosphoenolpyruvate carboxykinase                                            | FTL_1616 | YP_514255.1 | NC (SP) | Cyto (9.97)  | - | -                                                         | 60476.89  | 100.00% | 3  | 9%  |
| Hypothetical protein                                                         | FTL_1639 | YP_514278.1 | -       | Unknown      | - | -                                                         | 29381.81  | 99.90%  | 2  | 9%  |
| Hypothetical protein                                                         | FTL_1658 | YP_514293.1 | SpI     | Unknown      | - | S <sup>8</sup>                                            | 49321.86  | 100.00% | 6  | 18% |
| Lipid A transport protein, ABC transporter, ATP-binding and membrane protein | FTL_1668 | YP_514303.1 | -       | CM (10.00)   | - | M <sup>4</sup>                                            | 66676.73  | 100.00% | 6  | 12% |
| RND efflux transporter                                                       | FTL_1671 | YP_514306.1 | -       | CM (10.00)   | - | M <sup>4</sup>                                            | 50088.80  | 99.80%  | 2  | 5%  |
| AcrB/AcrD/AcrF family transporter                                            | FTL_1672 | YP_514307.1 | -       | CM (10.00)   | - | M <sup>4</sup>                                            | 112503.15 | 100.00% | 3  | 4%  |
| Hypothetical protein                                                         | FTL_1678 | YP_514310.1 | SpI     | Unknown      | - | M <sup>2</sup>                                            | 38458.69  | 100.00% | 3  | 11% |
| Cell division protein                                                        | FTL_1705 | YP_514336.1 | -       | CM (10.00)   | - | -                                                         | 92016.36  | 100.00% | 7  | 10% |
| *Chaperonin GroEL                                                            | FTL_1714 | YP_514345.1 | -       | Cyto (9.97)  | - | M <sup>3,10,15</sup> , T <sup>5,12</sup> , S <sup>8</sup> | 57402.70  | 100.00% | 16 | 46% |
| Co-chaperonin GroES                                                          | FTL_1715 | YP_514346.1 | -       | Cyto (9.26)  | - | T <sup>5,12</sup>                                         | 10271.87  | 100.00% | 2  | 24% |
| Hypothetical protein                                                         | FTL_1723 | YP_514354.1 | NC (SP) | Unknown      | - | M <sup>1</sup>                                            | 23828.44  | 100.00% | 3  | 17% |
| S-adenosylmethionine synthetase                                              | FTL_1739 | YP_514370.1 | -       | Cyto (10.00) | - | -                                                         | 42103.04  | 99.80%  | 2  | 7%  |
| DNA-directed RNA polymerase, beta subunit                                    | FTL_1743 | YP_514374.1 | -       | Cyto (9.97)  | - | -                                                         | 157387.04 | 100.00% | 26 | 24% |
| DNA-directed RNA polymerase subunit beta                                     | FTL_1744 | YP_514376.1 | -       | Cyto (9.97)  | - | -                                                         | 151335.66 | 100.00% | 19 | 19% |
| *50S ribosomal protein L7/L12 (RpL)                                          | FTL_1745 | YP_514376.1 | -       | Unknown      | - | M <sup>3</sup>                                            | 12847.82  | 99.80%  | 2  | 20% |
| 50S ribosomal protein L10                                                    | FTL_1746 | YP_514377.1 | -       | Cyto (9.26)  | - | M <sup>1</sup>                                            | 18731.70  | 100.00% | 5  | 42% |
| 50S ribosomal protein L1                                                     | FTL_1747 | YP_514378.1 | NC (SP) | Cyto (9.97)  | - | -                                                         | 24641.67  | 100.00% | 11 | 54% |
| 50S ribosomal protein L11                                                    | FTL_1748 | YP_514379.1 | NC (SP) | Cyto (9.26)  | - | T <sup>5</sup>                                            | 15269.89  | 100.00% | 3  | 16% |
| Transcription antitermination protein nusG                                   | FTL_1749 | YP_514380.1 | -       | Cyto (9.97)  | - | T <sup>5</sup>                                            | 19981.99  | 100.00% | 3  | 21% |
| *Elongation factor Tu (TufA)                                                 | FTL_1751 | YP_514382.1 | -       | Cyto (9.97)  | - | M <sup>3</sup>                                            | 43390.62  | 100.00% | 13 | 38% |
| Anaerobic glycerol-3-phosphate dehydrogenase                                 | FTL_1756 | YP_514387.1 | -       | Unknown      | - | -                                                         | 57775.19  | 100.00% | 11 | 26% |

|                                                                                               |          |             |         |             |     |                                 |           |         |    |     |
|-----------------------------------------------------------------------------------------------|----------|-------------|---------|-------------|-----|---------------------------------|-----------|---------|----|-----|
| Sensor histidine kinase                                                                       | FTL_1762 | YP_514393.1 | -       | CM (9.99)   | -   | -                               | 54752.94  | 100.00% | 3  | 7%  |
| *Aconitate hydratase                                                                          | FTL_1772 | YP_514399.1 | -       | Cyto (9.97) | -   | M <sup>1,3,6</sup>              | 102703.80 | 100.00% | 13 | 24% |
| Dihydrolipoamide succinyltransferase component of 2-oxoglutarate dehydrogenase complex (SucB) | FTL_1783 | YP_514408.1 | -       | Cyto (9.97) | -   | M <sup>1,3,6</sup>              | 52717.94  | 100.00% | 9  | 29% |
| Alpha-ketoglutarate decarboxylase                                                             | FTL_1784 | YP_514409.1 | -       | Cyto (9.97) | Yes | -                               | 105679.39 | 100.00% | 18 | 24% |
| Succinate dehydrogenase iron-sulfur subunit                                                   | FTL_1785 | YP_514410.1 | -       | CM (7.88)   | -   | M <sup>4</sup> , T <sup>5</sup> | 26565.80  | 100.00% | 5  | 24% |
| *Succinate dehydrogenase, catalytic and NAD/ flavoprotein subunit                             | FTL_1786 | YP_514411.1 | -       | CM (7.88)   | -   | M <sup>3,4</sup>                | 65860.61  | 100.00% | 7  | 15% |
| F0F1 ATP synthase subunit epsilon                                                             | FTL_1794 | YP_514419.1 | NC (SP) | Unknown     | -   | M <sup>4</sup>                  | 15736.95  | 100.00% | 3  | 30% |
| F0F1 ATP synthase subunit beta                                                                | FTL_1795 | YP_514420.1 | -       | Cyto (9.12) | -   | M <sup>4,10</sup>               | 49864.94  | 100.00% | 10 | 37% |
| F0F1 ATP synthase subunit gamma                                                               | FTL_1796 | YP_514421.1 | -       | Cyto (9.12) | -   | M <sup>4</sup>                  | 33235.28  | 100.00% | 4  | 18% |
| F0F1 ATP synthase subunit alpha                                                               | FTL_1797 | YP_514422.1 | -       | Cyto (9.97) | -   | M <sup>4</sup>                  | 55536.23  | 100.00% | 10 | 23% |
| F0F1 ATP synthase subunit delta                                                               | FTL_1798 | YP_514423.1 | -       | Cyto (9.26) | -   | M <sup>4</sup>                  | 19202.29  | 99.90%  | 2  | 20% |
| F0F1 ATP synthase subunit B                                                                   | FTL_1799 | YP_514424.1 | -       | CM (7.88)   | -   | M <sup>4</sup>                  | 17383.26  | 100.00% | 7  | 45% |
| Translation initiation factor IF-2                                                            | FTL_1809 | YP_514434.1 | -       | Cyto (9.97) | -   | -                               | 92422.06  | 100.00% | 10 | 20% |
| Transcription elongation factor NusA                                                          | FTL_1810 | YP_514435.1 | -       | Cyto (9.97) | -   | -                               | 55178.89  | 100.00% | 6  | 15% |
| Hypothetical protein                                                                          | FTL_1811 | YP_514436.1 | -       | Cyto (9.97) | -   | -                               | 16546.95  | 100.00% | 4  | 35% |
| NADH dehydrogenase subunit G                                                                  | FTL_1824 | YP_514446.1 | -       | Cyto (9.12) | -   | -                               | 87340.84  | 100.00% | 9  | 17% |
| NADH dehydrogenase I, F subunit                                                               | FTL_1825 | YP_514447.1 | -       | Cyto (9.12) | -   | M <sup>4</sup>                  | 46282.70  | 100.00% | 3  | 9%  |
| NADH dehydrogenase subunit D                                                                  | FTL_1827 | YP_514449.1 | -       | Cyto (9.12) | -   | M <sup>4</sup>                  | 47585.74  | 100.00% | 6  | 16% |
| NADH dehydrogenase I                                                                          | FTL_1828 | YP_514450.1 | -       | Cyto (9.12) | -   | M <sup>1,4</sup>                | 24988.46  | 99.80%  | 2  | 11% |
| Amidophosphoribosyltransferase                                                                | FTL_1861 | YP_514478.1 | -       | Cyto (9.97) | -   | -                               | 55417.57  | 100.00% | 4  | 8%  |
| Outer membrane protein tolC precursor                                                         | FTL_1865 | YP_514482.1 | SpI     | OM (10.00)  | -   | M <sup>10</sup>                 | 57243.63  | 100.00% | 3  | 11% |
| Protein-L-isoaspartate O-methyltransferase                                                    | FTL_1866 | YP_514483.1 | -       | Cyto (8.96) | -   | -                               | 23203.94  | 99.80%  | 2  | 11% |
| GTPase ObgE                                                                                   | FTL_1874 | YP_514488.1 | -       | Cyto (8.96) | -   | -                               | 36887.99  | 99.80%  | 2  | 10% |
| Glutamine synthetase                                                                          | FTL_1899 | YP_514509.1 | NC (SP) | Cyto (9.97) | -   | -                               | 38256.94  | 99.80%  | 2  | 9%  |
| *Cell division protein FtsZ                                                                   | FTL_1907 | YP_514517.1 | -       | Cyto (9.12) | -   | M <sup>3,4</sup>                | 39745.31  | 100.00% | 11 | 41% |
| Cell division protein FtsA                                                                    | FTL_1908 | YP_514518.1 | -       | Cyto (9.97) | -   | M <sup>4</sup>                  | 44804.05  | 100.00% | 7  | 20% |
| *30S ribosomal protein S1                                                                     | FTL_1912 | YP_514522.1 | -       | Cyto (9.97) | -   | -                               | 61669.35  | 100.00% | 9  | 22% |
| Adenylosuccinate synthetase                                                                   | FTL_1930 | YP_514535.1 | -       | Cyto (9.97) | -   | -                               | 46879.73  | 100.00% | 2  | 8%  |

|                                                                                        |          |             |     |             |   |                  |          |         |   |     |
|----------------------------------------------------------------------------------------|----------|-------------|-----|-------------|---|------------------|----------|---------|---|-----|
| ABC transporter, ATP-binding protein                                                   | FTL_1935 | YP_514538.1 | -   | CM (9.82)   | - | -                | 25593.76 | 99.80%  | 2 | 12% |
| Periplasmic solute binding family protein                                              | FTL_1936 | YP_514539.1 | SpI | CM (9.97)   | - | M <sup>1,4</sup> | 33814.86 | 100.00% | 7 | 40% |
| Heat shock protein                                                                     | FTL_1957 | YP_514555.1 | -   | Cyto (8.96) | - | M <sup>1</sup>   | 16739.78 | 99.80%  | 2 | 15% |
| Bifunctional indole-3-glycerol phosphate synthase/phosphoribosylanthranilate isomerase | FTL_1958 | YP_514556.1 | -   | Cyto (9.97) | - | -                | 51323.54 | 100.00% | 3 | 11% |
| Anthranilate synthase component I                                                      | FTL_1966 | YP_514562.1 | -   | Cyto (9.97) | - | -                | 58066.29 | 100.00% | 4 | 11% |

Protein identifications were accomplished using Scaffold version 4.0.0 software. Identifications were accepted if they could be established at greater than 99% probability and contained at least two identified peptides as assigned by the protein prophet algorithm.

\*Indicates the protein was identified on the surface of *F. tularensis* LVS.

Signal peptide prediction; SpI, signal peptide cleaved by signal peptidase I; SpII, signal peptide cleaved by signal peptidase II; NC (SP), non-classical signal peptide.

<sup>^</sup>Subcellular localization predicted with PSORTb; Peri, periplasmic; Cyto, cytosol; OM, outer membrane; CM, cytoplasmic membrane.

## Table S1 References

- (1) Pavkova, I.; Reichelova, M.; Larsson, P.; Hubalek, M.; Vackova, J.; Forsberg, A.; Stulik, J., Comparative proteome analysis of fractions enriched for membrane-associated proteins from *Francisella tularensis* subsp. *tularensis* and *F. tularensis* subsp. *holarctica* strains. *J Proteome Res* **2006**, 5, (11), 3125-34.
- (2) Pavkova, I.; Hubalek, M.; Zechovska, J.; Lenco, J.; Stulik, J., *Francisella tularensis* live vaccine strain: proteomic analysis of membrane proteins enriched fraction. *Proteomics* **2005**, 5, (9), 2460-7.
- (3) Janovska, S.; Pavkova, I.; Hubalek, M.; Lenco, J.; Macela, A.; Stulik, J., Identification of immunoreactive antigens in membrane proteins enriched fraction from *Francisella tularensis* LVS. *Immunol Lett* **2007**, 108, (2), 151-9.
- (4) Dresler, J.; Klimentova, J.; Stulik, J., *Francisella tularensis* membrane complexome by blue native/SDS-PAGE. *J Proteomics* **2011**, 75, (1), 257-69.
- (5) Konecna, K.; Hernychova, L.; Reichelova, M.; Lenco, J.; Klimentova, J.; Stulik, J.; Macela, A.; Alefantis, T.; DelVecchio, V. G., Comparative proteomic profiling of culture filtrate proteins of less and highly virulent *Francisella tularensis* strains. *Proteomics* **2010**, 10, (24), 4501-4511.
- (6) Janovska, S.; Pavkova, I.; Reichelova, M.; Hubaleka, M.; Stulik, J.; Macela, A., Proteomic analysis of antibody response in a case of laboratory-acquired infection with *Francisella tularensis* subsp. *tularensis*. *Folia Microbiol (Praha)* **2007**, 52, (2), 194-8.

- (7) Twine, S. M.; Mykytczuk, N. C.; Petit, M.; Tremblay, T. L.; Lanthier, P.; Conlan, J. W.; Kelly, J. F., *Francisella tularensis* proteome: low levels of ASB-14 facilitate the visualization of membrane proteins in total protein extracts. *J Proteome Res* **2005**, *4*, (5), 1848-54.
- (8) Melillo, A.; Sledjeski, D. D.; Lipski, S.; Wooten, R. M.; Basrur, V.; Lafontaine, E. R., Identification of a *Francisella tularensis* LVS outer membrane protein that confers adherence to A549 human lung cells. *FEMS Microbiol Lett* **2006**, *263*, (1), 102-8.
- (9) Broms, J. E.; Meyer, L.; Sun, K.; Lavander, M.; Sjostedt, A., Unique substrates secreted by the type VI secretion system of *Francisella tularensis* during intramacrophage infection. *PLoS One* **2012**, *7*, (11).
- (10) Huntley, J. F.; Conley, P. G.; Hagman, K. E.; Norgard, M. V., Characterization of *Francisella tularensis* outer membrane proteins. *J Bacteriol* **2007**, *189*, (2), 561-74.
- (11) Sandstrom, G.; Tarnvik, A.; Wolf-Watz, H., Immunospecific T-lymphocyte stimulation by membrane proteins from *Francisella tularensis*. *J Clin Microbiol* **1987**, *25*, (4), 641-4.
- (12) Lee, B. Y.; Horwitz, M. A.; Clemens, D. L., Identification, recombinant expression, immuno localization in macrophages, and T-cell responsiveness of the major extracellular proteins of *Francisella tularensis*. *Infection and Immunity* **2006**, *74*, (7), 4002-4013.
- (13) Straskova, A.; Pavkova, I.; Link, M.; Forslund, A. L.; Kuoppa, K.; Noppa, L.; Kroca, M.; Fucikova, A.; Klimentova, J.; Krocova, Z.; Forsberg, A.; Stulik, J., Proteome analysis of an attenuated *Francisella tularensis dsbA* mutant: identification of potential DsbA substrate proteins. *J Proteome Res* **2009**, *8*, (11), 5336-46.
- (14) Nano, F. E., Identification of a heat-modifiable protein of *Francisella-tularensis* and molecular-cloning of the encoding gene. *Microbial Pathogenesis* **1988**, *5*, (2), 109-119.
- (15) Havlasova, J.; Hernychova, L.; Halada, P.; Pellantova, V.; Krejsek, J.; Stulik, J.; Macela, A.; Jungblut, P. R.; Larsson, P.; Forsman, M., Mapping of immunoreactive antigens of *Francisella tularensis* live vaccine strain. *Proteomics* **2002**, *2*, (7), 857-67.

**Table S2. LC-MS/MS analysis of MPF spots**

| Spot # | Protein Name                                                            | Locus    | NCBI Reference Sequence | Predicted Molecular Mass (Da) | Protein Identification Probability | Number of Unique Peptides | Percentage Sequence Coverage |
|--------|-------------------------------------------------------------------------|----------|-------------------------|-------------------------------|------------------------------------|---------------------------|------------------------------|
| 1      | Dihydrolipoamide dehydrogenase (Ipd)                                    | FTL_0311 | YP_513103.1             | 50527.53                      | 100.00%                            | 6                         | 16%                          |
|        | ATP-dependent protease, ATP-binding subunit                             | FTL_0964 | YP_513675.1             | 51237.15                      | 100.00%                            | 7                         | 17%                          |
|        | *Glyceraldehyde-3-phosphate dehydrogenase (GapA)                        | FTL_1146 | YP_513832.1             | 35413.40                      | 100.00%                            | 2                         | 7%                           |
|        | Glutathione reductase                                                   | FTL_1248 | YP_513928.1             | 49547.59                      | 100.00%                            | 4                         | 10%                          |
| 2      | *Aspartate aminotransferase (AscP1)                                     | FTL_0387 | YP_513160.1             | 44382.87                      | 99.80%                             | 2                         | 4%                           |
|        | *Elongation factor Tu (TufA)                                            | FTL_1751 | YP_514382.1             | 43390.62                      | 100.00%                            | 16                        | 49%                          |
| 3      | *Outer membrane associated protein FopA1                                | FTL_1328 | YP_513994.1             | 41259.65                      | 100.00%                            | 6                         | 13%                          |
| 4      | *Outer membrane associated protein FopA1                                | FTL_1328 | YP_513994.1             | 41259.65                      | 100.00%                            | 6                         | 13%                          |
| 5      | *Outer membrane associated protein FopA1                                | FTL_1328 | YP_513994.1             | 41259.65                      | 100.00%                            | 13                        | 29%                          |
| 6      | *Outer membrane associated protein FopA1                                | FTL_1328 | YP_513994.1             | 41259.65                      | 100.00%                            | 5                         | 10%                          |
| 7      | *Outer membrane associated protein FopA1                                | FTL_1328 | YP_513994.1             | 41259.65                      | 100.00%                            | 4                         | 10%                          |
| 8      | *Outer membrane associated protein FopA1                                | FTL_1328 | YP_513994.1             | 41259.65                      | 100.00%                            | 8                         | 20%                          |
| 9-10   | Could not be identified with confidence                                 | -        | -                       | -                             | -                                  | -                         | -                            |
| 11     | *Acetyl-CoA carboxylase, biotin carboxyl carrier protein subunit (AccB) | FTL_1592 | YP_514231.1             | 16403.98                      | 100.00%                            | 7                         | 62%                          |
| 12     | *Acetyl-CoA carboxylase, biotin carboxyl carrier protein subunit (AccB) | FTL_1592 | YP_514231.1             | 16403.98                      | 100.00%                            | 7                         | 69%                          |
| 13     | *Hypothetical protein                                                   | FTL_0617 | YP_513376.1             | 16809.36                      | 100.00%                            | 11                        | 66%                          |
|        | *50S ribosomal protein L9 (RplI)                                        | FTL_1026 | YP_513727.1             | 16087.49                      | 100.00%                            | 12                        | 72%                          |
| 14     | *50S ribosomal protein L7/L12 (RplL)                                    | FTL_1745 | YP_514376.1             | 12847.82                      | 100.00%                            | 6                         | 43%                          |
| 15     | Could not be identified with confidence                                 | -        | -                       | -                             | -                                  | -                         | -                            |
| 16     | Hypothetical protein                                                    | FTL_0105 | YP_512904.1             | 13728.82                      | 100.00%                            | 5                         | 42%                          |
| 17     | 30S ribosomal protein S7                                                | FTL_0233 | YP_513028.1             | 17807.64                      | 100.00%                            | 6                         | 40%                          |
|        | 50S ribosomal protein L5                                                | FTL_0248 | YP_513043.1             | 19996.34                      | 100.00%                            | 9                         | 54%                          |
|        | 30S ribosomal protein S5 (RpsE)                                         | FTL_0253 | YP_513048.1             | 17527.25                      | 100.00%                            | 3                         | 21%                          |
|        | 50S ribosomal protein L15                                               | FTL_0255 | YP_513050.1             | 15095.61                      | 100.00%                            | 2                         | 16%                          |
|        | Outer membrane protein OmpH                                             | FTL_0536 | YP_513305.1             | 18782.40                      | 100.00%                            | 10                        | 52%                          |
|        | (3R)-hydroxymyristoyl-ACP dehydratase                                   | FTL_0538 | YP_513307.1             | 18150.25                      | 100.00%                            | 4                         | 22%                          |
|        | 50S ribosomal protein L13                                               | FTL_1187 | YP_513870.1             | 15937.61                      | 100.00%                            | 2                         | 13%                          |
|        | Hypothetical protein                                                    | FTL_0571 | YP_513331.1             | 22451.65                      | 100.00%                            | 9                         | 60%                          |

|    |                                                                                               |          |             |           |         |    |     |
|----|-----------------------------------------------------------------------------------------------|----------|-------------|-----------|---------|----|-----|
| 19 | Could not be identified with confidence                                                       | -        | -           | -         | -       | -  | -   |
|    | 30S ribosomal protein S7                                                                      | FTL_0233 | YP_513028.1 | 17807.64  | 100.00% | 4  | 33% |
|    | 50S ribosomal protein L16                                                                     | FTL_0243 | YP_513038.1 | 15710.48  | 100.00% | 2  | 17% |
|    | 50S ribosomal protein L5                                                                      | FTL_0248 | YP_513043.1 | 19996.34  | 99.80%  | 7  | 36% |
|    | 30S ribosomal protein S5 (RpsE)                                                               | FTL_0253 | YP_513048.1 | 17527.25  | 100.00% | 7  | 51% |
|    | 50S ribosomal protein L15                                                                     | FTL_0255 | YP_513050.1 | 15095.61  | 100.00% | 5  | 30% |
| 20 | 50S ribosomal protein L17                                                                     | FTL_0262 | YP_513057.1 | 16784.34  | 100.00% | 4  | 67% |
|    | Peptide methionine sulfoxide reductase                                                        | FTL_0379 | YP_513155.1 | 19632.31  | 100.00% | 2  | 9%  |
|    | *Lipoprotein (LpnA)                                                                           | FTL_0421 | YP_513194.1 | 15771.85  | 100.00% | 3  | 32% |
|    | 30S ribosomal protein S9                                                                      | FTL_1186 | YP_513869.1 | 14517.74  | 100.00% | 4  | 39% |
|    | 50S ribosomal protein L10                                                                     | FTL_1746 | YP_514377.1 | 18731.70  | 100.00% | 12 | 67% |
|    | 50S ribosomal protein L11                                                                     | FTL_1748 | YP_514379.1 | 15269.89  | 100.00% | 7  | 38% |
|    | 50S ribosomal protein L15                                                                     | FTL_0255 | YP_513050.1 | 15095.61  | 100.00% | 4  | 26% |
| 21 | *Lipoprotein (LpnA)                                                                           | FTL_0421 | YP_513194.1 | 15771.85  | 100.00% | 6  | 46% |
|    | Hypothetical protein                                                                          | FTL_0850 | YP_513572.1 | 20453.33  | 100.00% | 2  | 7%  |
|    | *Lipoprotein (LpnA)                                                                           | FTL_0421 | YP_513194.1 | 15771.85  | 100.00% | 8  | 55% |
| 22 | 50S ribosomal protein L10                                                                     | FTL_1746 | YP_514377.1 | 18731.70  | 100.00% | 5  | 29% |
|    | 30S ribosomal protein S10                                                                     | FTL_0235 | YP_513030.1 | 11895.96  | 100.00% | 5  | 49% |
| 23 | 50S ribosomal protein L24                                                                     | FTL_0247 | YP_513042.1 | 11476.34  | 100.00% | 4  | 36% |
|    | Hypothetical protein                                                                          | FTL_0617 | YP_513376.1 | 16809.36  | 100.00% | 3  | 24% |
|    | Histone-like protein HU form B (HupB)                                                         | FTL_0895 | YP_513614.1 | 9473.90   | 100.00% | 5  | 50% |
| 24 | 50S ribosomal protein L31                                                                     | FTL_1303 | YP_513974.2 | 9607.09   | 100.00% | 2  | 28% |
|    | 30S ribosomal protein S16                                                                     | FTL_1738 | YP_514369.1 | 9071.71   | 100.00% | 2  | 20% |
| 25 | Pyruvate dehydrogenase, E1 component (AceE)                                                   | FTL_0309 | YP_513101.1 | 100268.34 | 100.00% | 24 | 27% |
| 26 | *Chitinase family 18 protein (ChiA)                                                           | FTL_1521 | YP_514168.1 | 83595.21  | 100.00% | 6  | 8%  |
| 27 | *Peroxidase/catalase (KatG)                                                                   | FTL_1504 | YP_514154.1 | 81226.95  | 100.00% | 5  | 6%  |
| 28 | *Chaperone protein DnaK                                                                       | FTL_1191 | YP_513874.1 | 69182.22  | 100.00% | 22 | 41% |
| 29 | Dihydrolipoamide acetyltransferase (AceF)                                                     | FTL_0310 | YP_513102.1 | 56798.85  | 100.00% | 14 | 29% |
|    | *Chaperonin GroEL                                                                             | FTL_1714 | YP_514345.1 | 57402.70  | 100.00% | 39 | 79% |
| 30 | Dihydrolipoamide succinyltransferase component of 2-oxoglutarate dehydrogenase complex (SucB) | FTL_1783 | YP_514408.1 | 52717.94  | 100.00% | 10 | 26% |

Protein identifications were accomplished using Scaffold version 4.0.0 software. Identifications were accepted if they could be established at greater than 99% probability and contained at least two identified peptides as assigned by the protein prophet algorithm.

\*Indicates the protein was identified on the surface of *F. tularensis* LVS.

**Table S3. LC-MS/MS analysis of *F. tularensis* LVS surface proteins**

| Protein Name                                                                         | Locus    | NCBI Reference Sequence | Fraction ID         | Predicted MW (Da) | Protein Identification Probability | Number of Unique Peptides | Percentage Sequence Coverage |
|--------------------------------------------------------------------------------------|----------|-------------------------|---------------------|-------------------|------------------------------------|---------------------------|------------------------------|
| * <sup>C</sup> 50S ribosomal protein L7/L12 (RplL)                                   | FTL_1745 | YP_514376.1             | 10-15 kDa           | 12847.82          | 99.80%                             | 2                         | 22%                          |
| * <sup>CT</sup> Lipoprotein (LpnA)                                                   | FTL_0421 | YP_513194.1             | 15-20 kDa           | 15771.85          | 100.00%                            | 3                         | 22%                          |
| * <sup>CT</sup> Hypothetical protein                                                 | FTL_0617 | YP_513376.1             | 15-20 kDa           | 16809.36          | 100.00%                            | 5                         | 45%                          |
| * <sup>C</sup> 50S ribosomal protein L9 (RplI)                                       | FTL_1026 | YP_513727.1             | 15-20 kDa           | 16087.49          | 99.80%                             | 2                         | 19%                          |
| <sup>CT</sup> Acetyl-CoA carboxylase, biotin carboxyl carrier protein subunit (AccB) | FTL_1592 | YP_514231.1             | 20-25 and 15-20 kDa | 16403.98          | 100.00%                            | 6                         | 59%                          |
| * <sup>CT</sup> Outer membrane protein                                               | FTL_0009 | YP_512819.1             | 20-25 kDa           | 19477.11          | 100.00%                            | 5                         | 34%                          |
| * <sup>CT</sup> Intracellular growth locus, subunit A                                | FTL_0111 | YP_512909.1             | 20-25 kDa           | 20890.88          | 99.80%                             | 2                         | 14%                          |
| * <sup>T</sup> Intracellular growth locus, subunit C                                 | FTL_0113 | YP_512911.1             | 20-25 kDa           | 22133.41          | 99.80%                             | 2                         | 13%                          |
| * <sup>C</sup> Peptidoglycan-associated lipoprotein                                  | FTL_0336 | YP_513124.1             | 20-25 kDa           | 23291.32          | 99.80%                             | 2                         | 11%                          |
| * <sup>C</sup> Hypothetical protein                                                  | FTL_0569 | YP_513329.1             | 20-25 kDa           | 19785.57          | 99.80%                             | 2                         | 24%                          |
| * <sup>C</sup> AhpC/TSA family protein                                               | FTL_1015 | YP_513716.1             | 20-25 kDa           | 19668.22          | 100.00%                            | 3                         | 28%                          |
| <sup>C</sup> Hypothetical protein                                                    | FTL_1494 | YP_514145.1             | 20-25 kDa           | 18158.27          | 99.80%                             | 2                         | 18%                          |
| <sup>CT</sup> Hypothetical protein                                                   | FTL_1225 | YP_513908.1             | 25-37 kDa           | 25699.94          | 99.80%                             | 2                         | 11%                          |
| <sup>C</sup> Hypothetical protein                                                    | FTL_1579 | YP_514218.1             | 25-37 kDa           | 25702.85          | 99.80%                             | 2                         | 11%                          |
| * <sup>C</sup> OmpA family protein                                                   | FTL_0325 | YP_513113.1             | 37-50 kDa           | 46754.18          | 99.80%                             | 2                         | 6%                           |
| * <sup>C</sup> Aspartate aminotransferase (AscP1)                                    | FTL_0387 | YP_513160.1             | 37-50 kDa           | 44382.87          | 100.00%                            | 4                         | 14%                          |
| * <sup>C</sup> Glyceraldehyde-3-phosphate dehydrogenase (GapA)                       | FTL_1146 | YP_513832.1             | 37-50 kDa           | 35413.40          | 99.80%                             | 2                         | 8%                           |
| * <sup>C</sup> Outer membrane associated protein FopA1                               | FTL_1328 | YP_513994.1             | 37-50 kDa           | 41259.65          | 100.00%                            | 5                         | 12%                          |
| * <sup>C</sup> Succinyl-CoA synthetase subunit beta                                  | FTL_1553 | YP_514199.1             | 37-50 kDa           | 41541.74          | 100.00%                            | 4                         | 17%                          |
| <sup>C</sup> Citrate synthase                                                        | FTL_1789 | YP_514414.1             | 37-50 kDa           | 46794.56          | 100.00%                            | 3                         | 10%                          |
| * <sup>CT</sup> Cell division protein FtsZ                                           | FTL_1907 | YP_514517.1             | 37-50 kDa           | 39745.31          | 100.00%                            | 4                         | 15%                          |
| * <sup>CT</sup> Elongation factor Tu (TufA)                                          | FTL_1751 | YP_514382.1             | 50-75 and 37-50 kDa | 43390.62          | 100.00%                            | 7                         | 31%                          |
| * <sup>C</sup> Intracellular growth locus, subunit B                                 | FTL_0112 | YP_512910.1             | 50-75 kDa           | 57917.61          | 100.00%                            | 7                         | 17%                          |
| * <sup>C</sup> Glutamate dehydrogenase (Gdh)                                         | FTL_0269 | YP_513063.1             | 50-75 kDa           | 49158.07          | 100.00%                            | 3                         | 11%                          |
| * <sup>C</sup> Hypothetical protein                                                  | FTL_0572 | YP_513332.1             | 50-75 kDa           | 51977.34          | 100.00%                            | 3                         | 7%                           |
| * <sup>C</sup> Lipoprotein (DsbG)                                                    | FTL_1096 | YP_513788.1             | 50-75 kDa           | 39545.19          | 100.00%                            | 4                         | 18%                          |
| * <sup>C</sup> Enolase (2-phosphoglycerate dehydratase)                              | FTL_1527 | YP_514174.1             | 50-75 kDa           | 49511.19          | 99.80%                             | 2                         | 8%                           |
| * <sup>CT</sup> Chaperonin GroEL                                                     | FTL_1714 | YP_514345.1             | 50-75 kDa           | 57402.70          | 100.00%                            | 8                         | 20%                          |
| <sup>C</sup> Succinate dehydrogenase, catalytic and NAD/ flavoprotein subunit        | FTL_1786 | YP_514411.1             | 50-75 kDa           | 65860.61          | 99.90%                             | 2                         | 5%                           |
| * <sup>C</sup> 30S ribosomal protein S1                                              | FTL_1912 | YP_514522.1             | 50-75 kDa           | 61669.35          | 100.00%                            | 5                         | 12%                          |
| * <sup>C</sup> Elongation factor G                                                   | FTL_0234 | YP_513029.1             | 75-100 kDa          | 77730.37          | 100.00%                            | 6                         | 13%                          |
| * <sup>C</sup> Heat shock protein 90                                                 | FTL_0267 | YP_513061.1             | 75-100 kDa          | 72371.65          | 100.00%                            | 7                         | 13%                          |
| * <sup>CT</sup> Chaperone protein DnaK                                               | FTL_1191 | YP_513874.1             | 75-100 kDa          | 69182.22          | 100.00%                            | 5                         | 10%                          |
| * <sup>CT</sup> Peroxidase/catalase (KatG)                                           | FTL_1504 | YP_514154.1             | 75-100 kDa          | 81226.95          | 100.00%                            | 3                         | 6%                           |
| * <sup>C</sup> Chitinase family 18 protein (ChiA)                                    | FTL_1521 | YP_514168.1             | 75-100 kDa          | 83595.21          | 100.00%                            | 3                         | 5%                           |
| * <sup>C</sup> Aconitate hydratase                                                   | FTL_1772 | YP_514399.1             | 100-150 kDa         | 102703.80         | 99.80%                             | 2                         | 3%                           |



Protein identifications were accomplished using Scaffold version 4.0.0 software. Identifications were accepted if they could be established at greater than 99% probability and contained at least two identified peptides as assigned by the protein prophet algorithm.

\*Indicates the protein was identified in the MPF.

<sup>C</sup>Indicates the protein was identified using chymotrypsin digestions

<sup>T</sup>Indicates the protein was identified using trypsin digestions
